# Supplementary material for: Side chain effect on the electrochemical and optical properties of thieno[3,4-c]pyrrole-4,6-dione based donor–acceptor donor type monomers and polymers
Source: Royal Society of Chemistry journal article supplement (doi:10.1039/d2me00148a), 2022-09-30
Supplement: d2me00148a1.pdf [file d2me00148a1.pdf]

**Side Chain effect on the electrochemical and optical properties of thieno[3,4-c]pyrrole-4,6-dione based donor acceptor donor type monomers and polymers**

Deniz Çakal<sup>a</sup>, Elif Demir Arabacı<sup>a</sup>, Erol Yıldırım<sup>a</sup>, Atilla Cihaner<sup>b,\*</sup>, Ahmet M. Önal<sup>a,\*</sup>

<sup>a</sup>Department of Chemistry, Middle East Technical University, Ankara, 06800, Turkey.

<sup>b</sup>Department of Chemical Engineering, Atilim University, Ankara, 06836, Turkey.

|                                                                                                          |                                                                                                           |
|----------------------------------------------------------------------------------------------------------|-----------------------------------------------------------------------------------------------------------|
| <p><b>E(EH)</b></p> 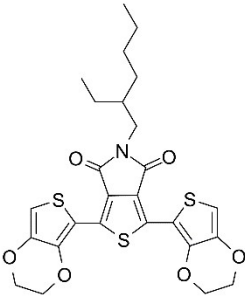    | <p><b>P(EH)</b></p>     |
| <p><b>E(POSS)</b></p>  | <p><b>P(POSS)</b></p>  |
| <p><b>E(AB)</b></p>   | <p><b>P(AB)</b></p>   |
| <p><b>E(FI)</b></p>   | <p><b>P(FI)</b></p>   |

**Scheme S1.** The structures of TPD based donor acceptor donor monomers with different side chains.

**Table S1.** The calculated band transitions in FI-appended unsubstitued ProDOT based D-A-D monomer.

| <b>Wavelength (nm)</b> | <b>Osc. Strength</b> | <b>Major contribs</b>           |
|------------------------|----------------------|---------------------------------|
| <b>405.72</b>          | <b>0.52</b>          | <b>HOMO-&gt;LUMO (99%)</b>      |
| 375.35                 | 0.19                 | H-1->LUMO (49%), H-1->L+1 (43%) |
| 301.83                 | 0.23                 | H-4->LUMO (87%)                 |
| 281.94                 | 0.42                 | H-6->LUMO (13%), H-1->L+2 (56%) |
| 279.26                 | 0.23                 | H-6->LUMO (59%), H-1->L+2 (18%) |

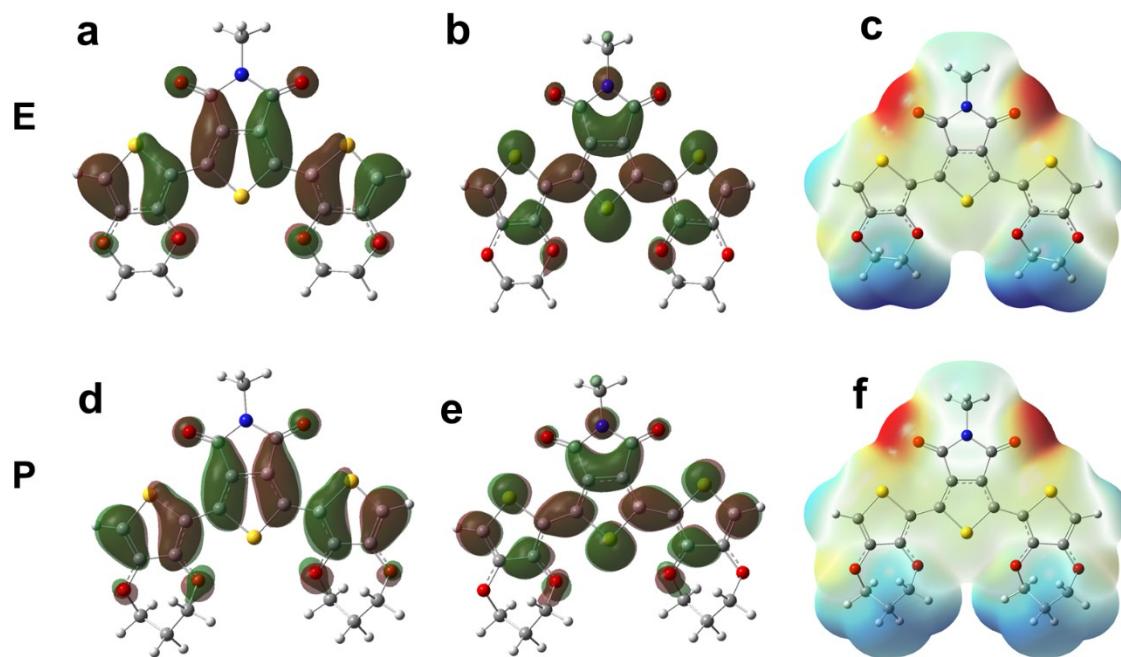

**Figure S1.** HOMO, LUMO and ESP surfaces for the pristine methyl substituted EDOT (E) and ProDOT (P).

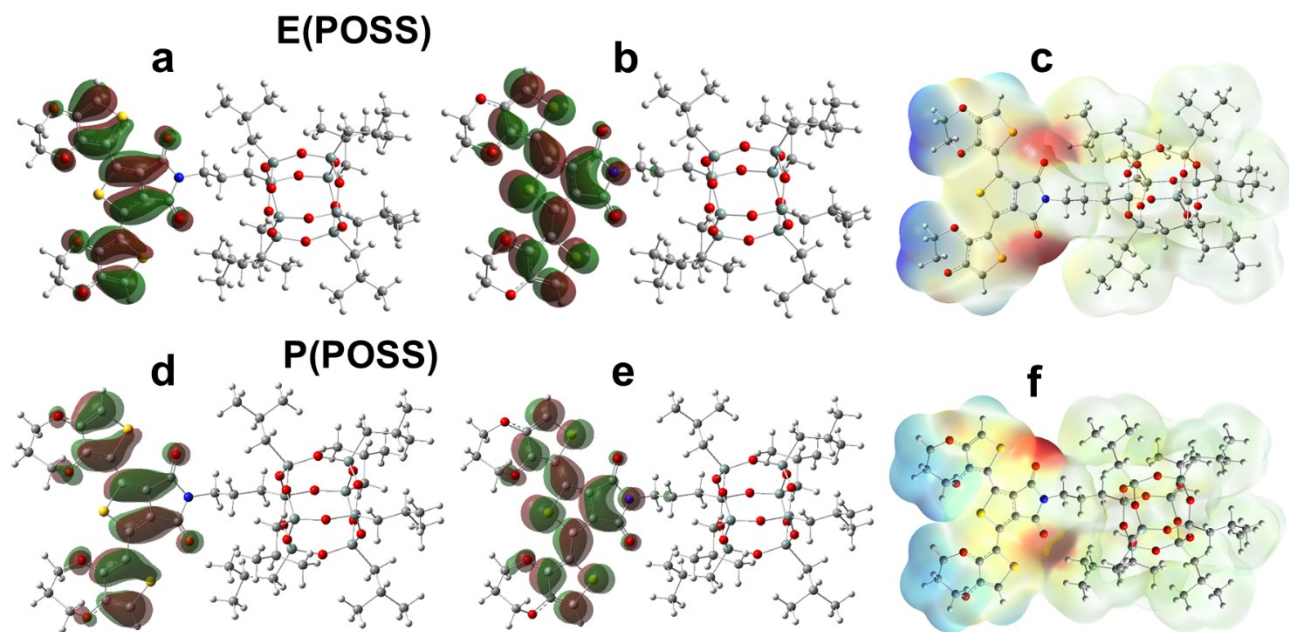

**Figure S2.** HOMO, LUMO and ESP surfaces for the pristine methyl substituted E(POSS) and P(POSS).

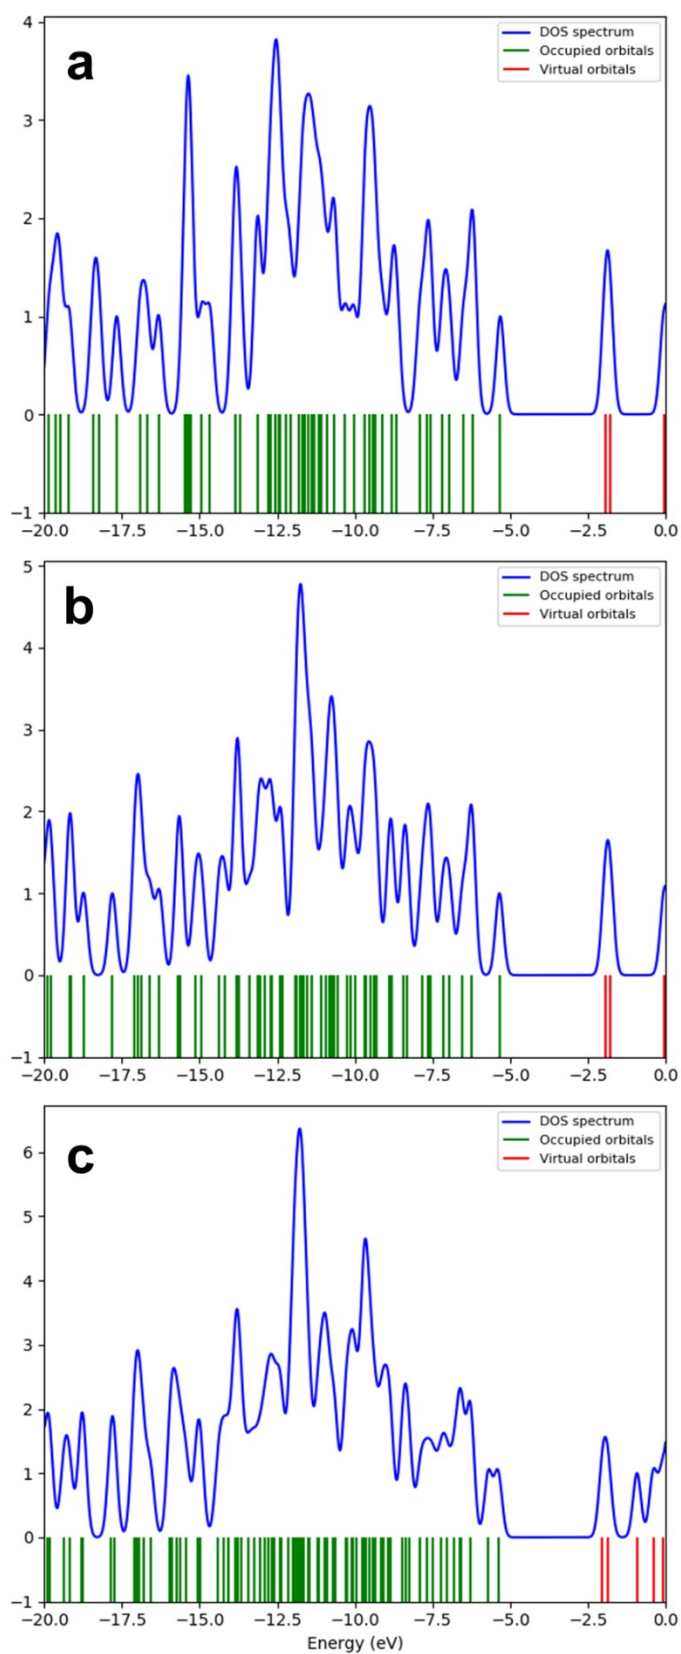

**Figure S3.** Density of states for the (a) pristine EDOT (**E**), (b) pristine ProDOT (**P**), (c) **P(FI)**.

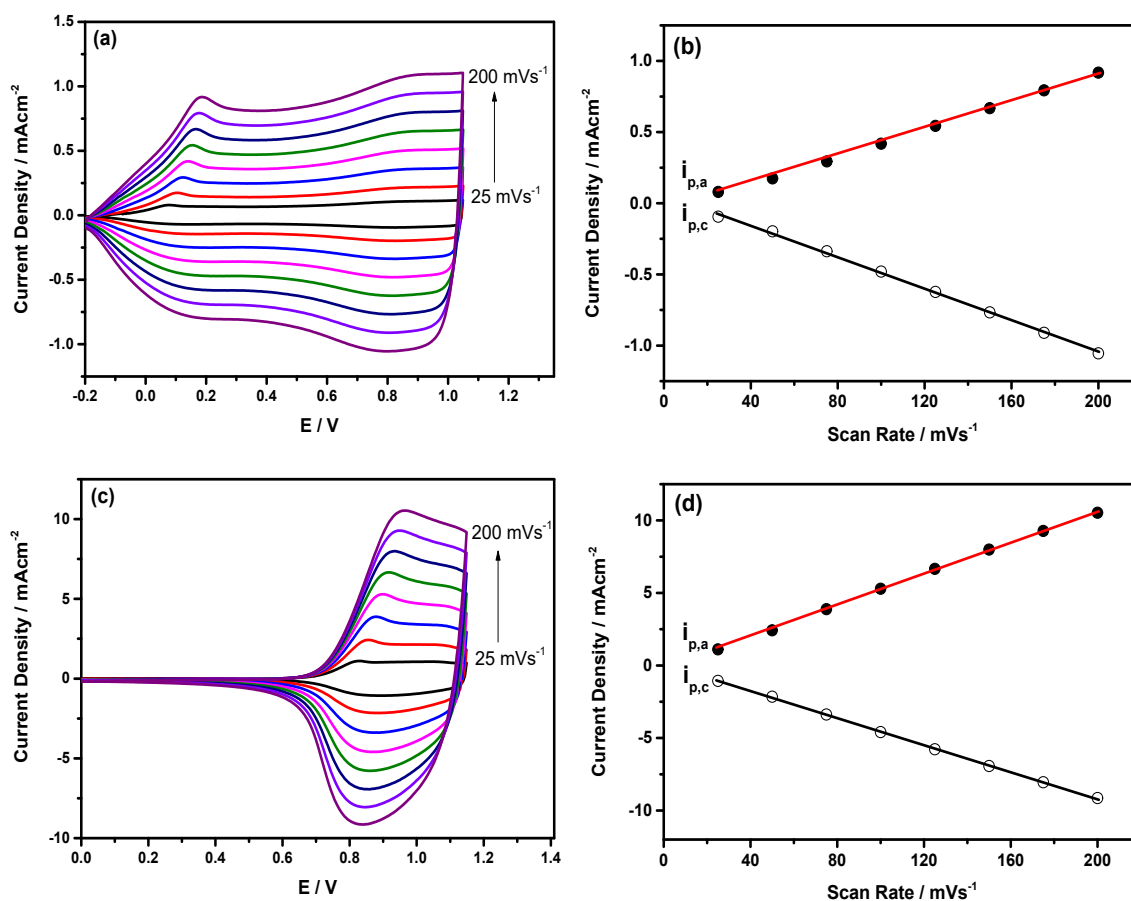

**Figure S4.** Scan rate dependence of the polymer films on Pt disc electrode recorded in 0.1 M n-Bu<sub>4</sub>NPF<sub>6</sub> solution (a) **PE(FI)** in DCM and (c) **PP(FI)** in MeCN at different scan rates from 25 mVs<sup>-1</sup> to 200 mVs<sup>-1</sup> with 25 mVs<sup>-1</sup> increments. The relationship of anodic and cathodic current peaks as a function of scan rate for (b) **PE(FI)** and (d) **PP(FI)** polymer films

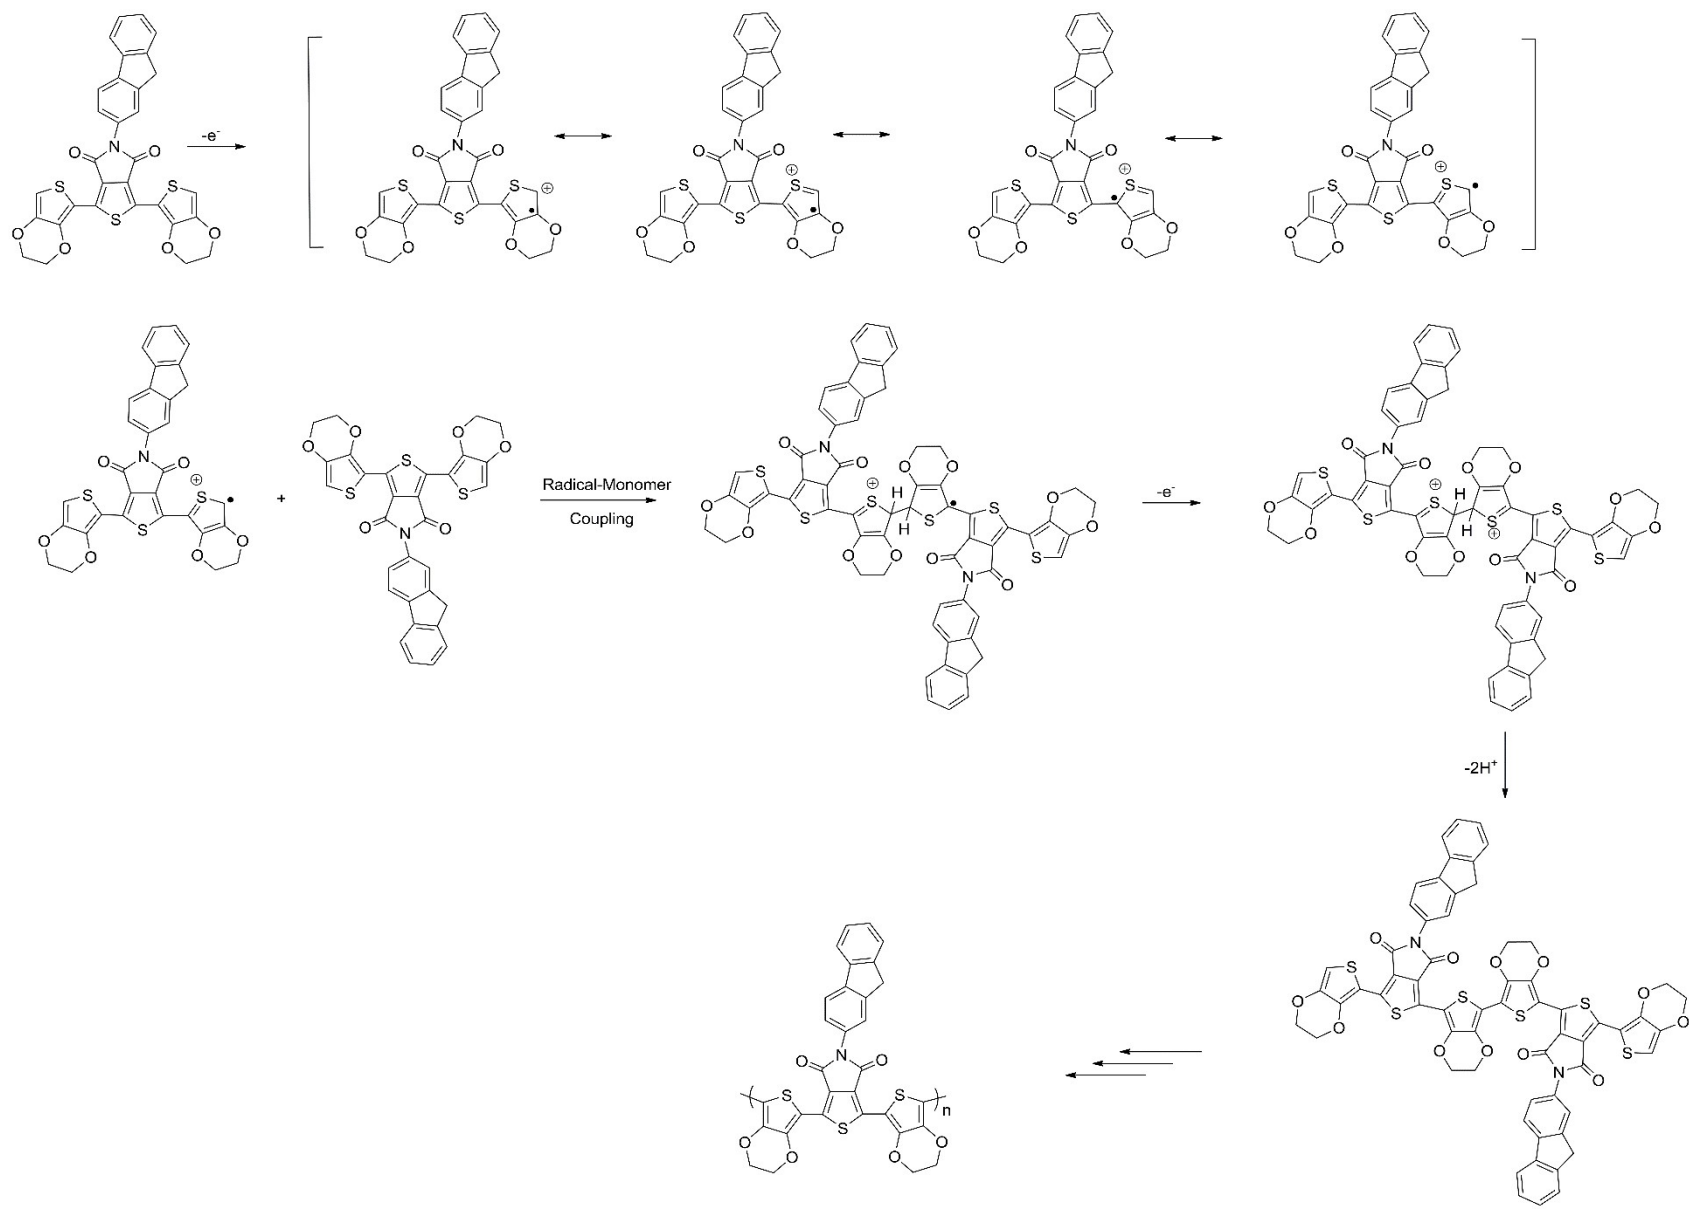

**Scheme S2.** The proposed mechanism for electrochemical polymerization of E(FI) via radical-monomer coupling.

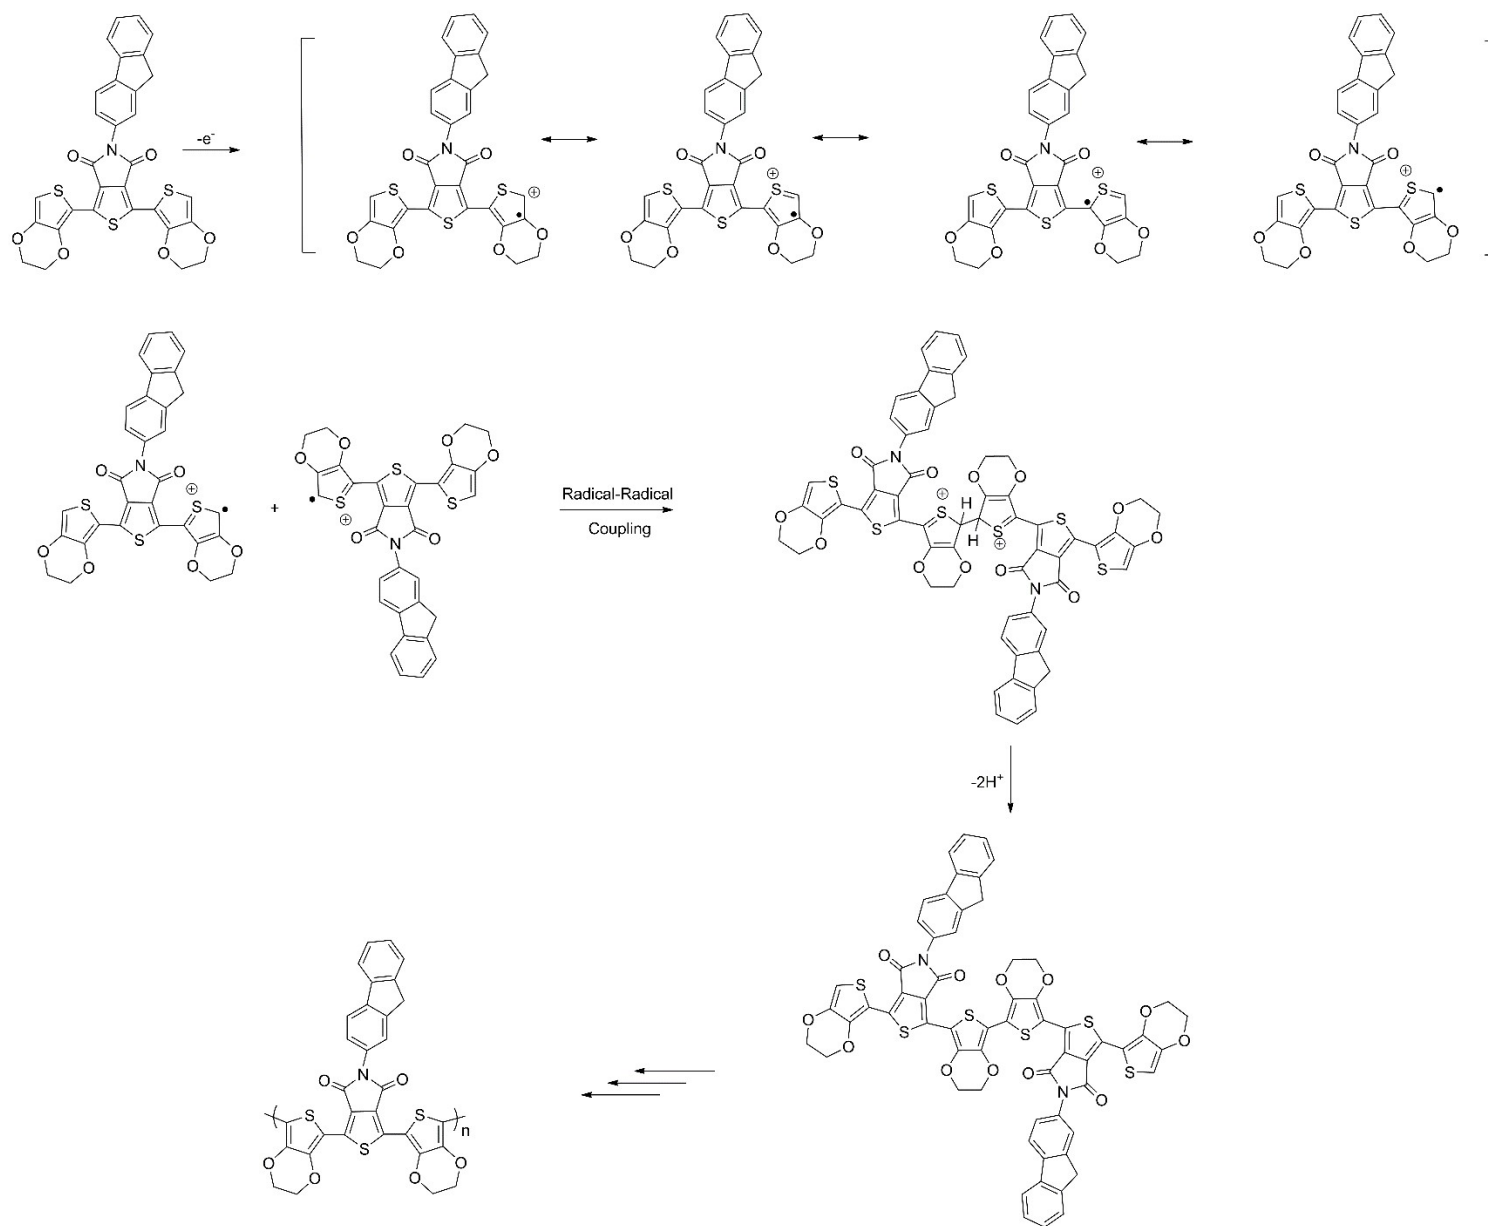

**Scheme S3.** The proposed mechanism for electrochemical polymerization of **E(FI)** via radical-radical coupling.



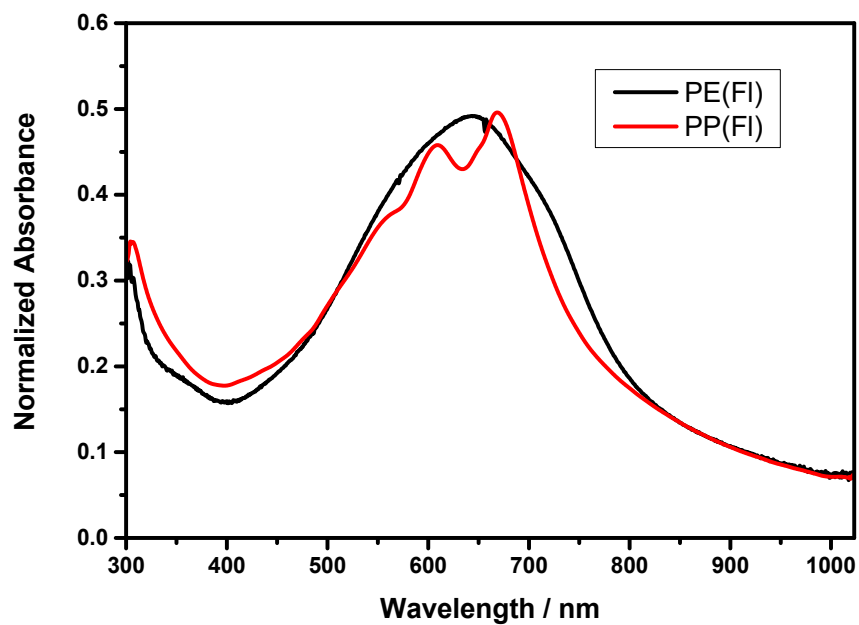

**Figure S5.** Neutral state absorption spectra of **PE(FI)** and **PP(FI)** films coated on ITO electrode in 0.1 M  $n\text{-Bu}_4\text{NPF}_6/\text{MeCN}$ .

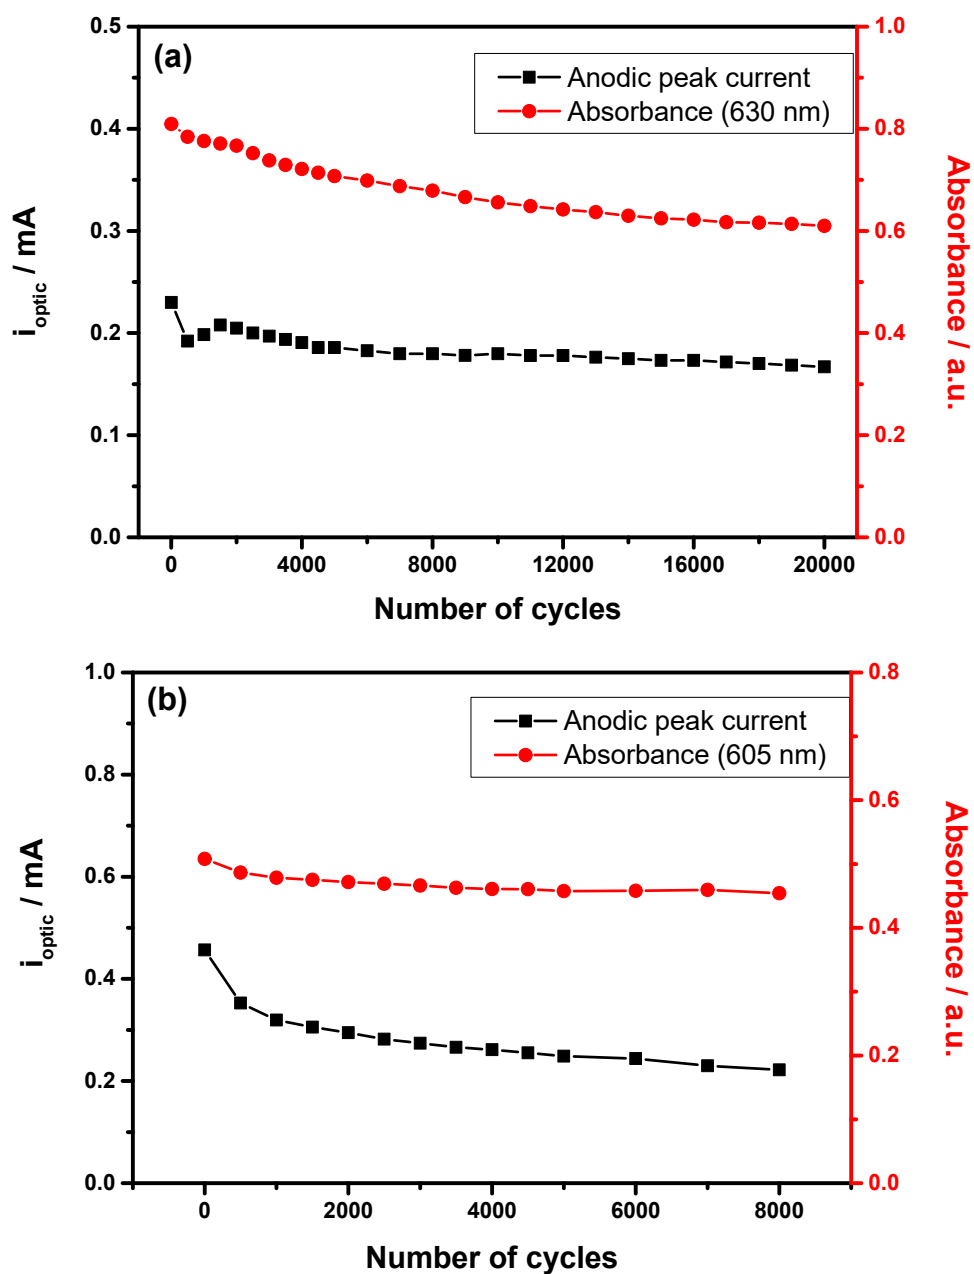

**Figure S6.** Electrochemical and optical stability tests for the polymer films on ITO in 0.1 M n-Bu<sub>4</sub>NPF<sub>6</sub>/MeCN when the films switched between redox states (-0.5 V and +1.1 V) at 630 nm for (a) **PE(FI)** and (0.0 V and +1.1 V) at 605 nm for (b) **PP(FI)** with an interval of 1 s.
